# Supplementary material
Source: bioRxiv or medRxiv preprint supplement (https://www.medrxiv.org/highwire/filestream/84592/field_highwire_adjunct_files/1/2020.06.04.20122069-2.pdf)
Supplement: Supplementary file [file 2020.06.04.20122069-2.pdf]

|                         | D1 | D2 | D3 | D4 | D5 | D6 | D7 | D8 | D9 | Overall |
|-------------------------|----|----|----|----|----|----|----|----|----|---------|
| Liu, K. et al.          |    |    |    |    |    |    |    |    |    |         |
| Mo, P. et al.           |    |    |    |    |    |    |    |    |    |         |
| Guan et al., 2020       |    |    |    |    |    |    |    |    |    |         |
| Guo et al. 2020         |    |    |    |    |    |    |    |    |    |         |
| Huang. C. et al. 2020   |    |    |    |    |    |    |    |    |    |         |
| Shi S. et al., 2020     |    |    |    |    |    |    |    |    |    |         |
| Wang et al., 2020a      |    |    |    |    |    |    |    |    |    |         |
| Yang et al., 2020       |    |    |    |    |    |    |    |    |    |         |
| Grasselli et al., 2020  |    |    |    |    |    |    |    |    |    |         |
| Bhatraju et al., 2020   |    |    |    |    |    |    |    |    |    |         |
| Arenz et al., 2020      |    |    |    |    |    |    |    |    |    |         |
| Wu C. et al., 2020      |    |    |    |    |    |    |    |    |    |         |
| Chen et al., 2020       |    |    |    |    |    |    |    |    |    |         |
| Zhou et al., 2020       |    |    |    |    |    |    |    |    |    |         |
| Wang et al., 2020b      |    |    |    |    |    |    |    |    |    |         |
| Richardson et al., 2020 |    |    |    |    |    |    |    |    |    |         |

D1: 1 Was the research question or objective in this paper clearly stated?

D2: 2 Was the study population clearly specified and defined?

D3: 3 Was the participation rate of eligible persons at least 50%?

D4: 4 Were all the subjects selected or recruited from the same or similar populations?

D5: 5 For the analyses in this paper, were the exposure(s) of interest measured prior to the outcome(s) being measured?

D6: 6 Was the timeframe sufficient so that one could reasonably expect to see an association between exposure and outcome if it existed?

D7: 7 For exposures that can vary in amount or level, did the study examine different levels of the exposure as related to the outcome?

D8: 8 Were the outcome measures (dependent variables) clearly defined, valid, reliable, and implemented consistently across all study participants?

D9: 9 Were key potential confounding variables measured and adjusted statistically for their impact on the relationship between exposure(s) and outcome(s)?

Judgement  
 Poor  
 Fair  
 Good
